1 **A Kozak-related non-coding deletion effectively increases B.1.1.7 transmissibility**

2

3 Jianing Yang<sup>1,†</sup>, Guoqing Zhang<sup>1,†</sup>, Dalang Yu<sup>1,†</sup>, Ruifang Cao<sup>1,†</sup>, Xiaoxian Wu<sup>2</sup>,  
4 Yunchao Ling<sup>1</sup>, Yi-Hsuan Pan<sup>4</sup>, Chunyan Yi<sup>3</sup>, Xiaoyu Sun<sup>3</sup>, Bing Sun<sup>3</sup>, Yu Zhang<sup>2</sup>,  
5 Guo-Ping Zhao<sup>1,2,5,\*</sup>, Yixue Li<sup>1,6,\*</sup>, Haipeng Li<sup>1,7,8,\*</sup>

6

7 <sup>1</sup>Bio-Med Big Data Center, CAS Key Laboratory of Computational Biology,  
8 Shanghai Institute of Nutrition and Health, University of Chinese Academy of  
9 Sciences, Chinese Academy of Sciences, Shanghai 200031, China.

10 <sup>2</sup>Key Laboratory of Synthetic Biology, CAS Center for Excellence in Molecular Plant  
11 Sciences, Institute of Plant Physiology and Ecology, Chinese Academy of Sciences,  
12 Shanghai 200032, China.

13 <sup>3</sup>Laboratory of Cell Biology, Shanghai Institute of Biochemistry and Cell Biology,  
14 Center for Excellence in Molecular Cell Science, Chinese Academy of Sciences,  
15 Shanghai 200031, China.

16 <sup>4</sup>Key Laboratory of Brain Functional Genomics of Ministry of Education, School of  
17 Life Science, East China Normal University, Shanghai 200062, China.

18 <sup>5</sup>School of Life and Health Sciences, Hangzhou Institute for Advanced Study,  
19 University of Chinese Academy of Sciences, Hangzhou, China.

20 <sup>6</sup>Bioland Laboratory (Guangzhou Regenerative Medicine and Health Guangdong  
21 Laboratory), Guangzhou 510005, China.

22 <sup>7</sup>Center for Excellence in Animal Evolution and Genetics, Chinese Academy of  
23 Sciences, Kunming 650223, China.

24 <sup>8</sup>Lead Contact

25

26 <sup>†</sup>These authors contributed equally.

27 <sup>\*</sup>Corresponding authors: [gpzhao@sibs.ac.cn](mailto:gpzhao@sibs.ac.cn); [yxli@sibs.ac.cn](mailto:yxli@sibs.ac.cn); [lihaipeng@picb.ac.cn](mailto:lihaipeng@picb.ac.cn)

28

29 **Abstract**

30 The high transmissibility acquisition of SARS-CoV-2 Variant of Concern (VOC)  
31 B.1.1.7 remains unclear and only mutations in coding regions have been examined.  
32 We analyzed 875,338 high-quality SARS-CoV-2 genomic sequences and the  
33 epidemiology metadata. The occurrence of a non-coding deletion (g.a28271-) in the  
34 B.1.1.7 background immediately causes the rapid spread of B.1.1.7. The number of  
35 B.1.1.7-like strains lacking the deletion is significantly less than that of B.1.1.7 strains  
36 ( $n = 259$  vs 92,688,  $P$ -value  $< 4.9 \times 10^{-324}$ ). The same highly significant statistics is  
37 observed in different countries, gender and age groups. However, the deletion alone  
38 does not cause such high viral transmissibility. The deletion and another mutation  
39 (g.gat28280cta) co-affect translational efficiency of the genes *N* and *ORF9b* by  
40 changing the core Kozak sites. The deletion interacts synergistically with S:p.P681H  
41 and S:p.T716I to increase viral transmissibility. Therefore, the Kozak-related  
42 non-coding deletion, also carried by the Delta VOC, is crucial for the high viral  
43 transmissibility of SARS-CoV-2.

44

## 45 **Introduction**

46 SARS-CoV-2 lineage B.1.1.7, also known as Variant of Concern (VOC)  
47 202012/01 or the Alpha VOC, is a variant first detected in the UK in September 2020  
48 (1) and has higher transmissibility than the preexisting variants (2). Its high  
49 transmissibility remains similar across different age, sex and socioeconomic strata (3).  
50 It has spread to 97 countries/regions within seven months and its global infection  
51 frequency increases quickly to over 80% (Supplementary Figure S1). Comparing with  
52 the reference genomic sequence of SARS-CoV-2 (GenBank accession number:  
53 NC\_045512.2) (4), the sequence of the B.1.1.7 variant has 20 non-synonymous  
54 mutations and amino-acid deletions in *ORF1ab*, spike (*S*), *ORF8*, and nucleocapsid (*N*)  
55 genes (Supplementary Table S1) (5). Among them, it was previously found that each  
56 of the mutations S:p.N501Y (6, 7) and S:p.D614G (8, 9) may increase the viral  
57 transmissibility, and S:p.P681H, located on the spike S1/S2 cleavage site, may affect  
58 the cleavableness and activation of the spike protein (1, 10). However, the crucial  
59 mutations for the high transmissibility of the B.1.1.7 VOC still remain unclear.

60 Most if not all of the current studies focused merely on non-synonymous  
61 mutations and amino-acid deletions(11-16) when studying the crucial mutations for  
62 the high transmissibility of the B.1.1.7 VOC. Non-coding mutations have been  
63 ignored in those studies and are not presented in the pathogen genomics platform  
64 Nextstrain ([www.nextstrain.org](http://www.nextstrain.org)) either (17). Therefore, we analyzed 875,338  
65 high-quality SARS-CoV-2 genomic sequences and the associated epidemiology  
66 metadata. The occurrence of a non-coding deletion (g.a28271-) in the B.1.1.7  
67 background immediately causes the rapid spread of B.1.1.7 VOC. Although the  
68 B.1.1.7 spike appears to have a higher binding affinity with the  
69 angiotensin-converting enzyme 2 (ACE2) (11), the variant with B.1.1.7 spike had no  
70 high transmissibility until the non-coding deletion occurred. Interestingly, the  
71 non-coding deletion alone does not cause such high viral transmissibility and is  
72 unlikely to have apparent fitness advantage, indicating the importance of mutation  
73 interactions. We also found that the non-coding deletion is carried by the Delta VOC.

74 Therefore, the Kozak-related non-coding deletion and its interactions with other  
75 mutations are crucial for the high viral transmissibility of SARS-CoV-2.

76

## 77 **Methods**

### 78 **Data sources**

79 The annotated evolutionary tree and evolutionary network data were obtained from  
80 the Coronavirus GenBrowser (18) and VENAS (19). All sequence data of  
81 SARS-CoV-2 were obtained from the 2019nCoV database (20, 21), which is an  
82 integrated resource based on Global Initiative on Sharing All Influenza Data (GISAID)  
83 (22, 23), National Center for Biotechnology Information (NCBI) GenBank (24),  
84 China National GeneBank DataBase (CNGb) (25), the Genome Warehouse (GWH)  
85 (26), and the National Microbiology Data Center (NMDC, <https://nmcdc.cn/>).

86

### 87 **The effectiveness of the non-coding deletion in improving transmissibility**

88 To evaluate the effectiveness of the non-coding deletion in improving  
89 transmissibility, we tested whether B.1.1.7-like and B.1.1.7 strains have the same  
90 transmissibility. The former indicate the viral strains lacking the non-coding deletion  
91 but carrying all other characteristic mutations of B.1.1.7 (Figure 1A, Supplementary  
92 Table S1) (5), including all B.1.1.7 spike mutations(11). The latter carry all those  
93 mutations, including the non-coding deletion. The null hypothesis is that the  
94 B.1.1.7-like and B.1.1.7 strains have the same transmissibility, and the alternative  
95 hypothesis is that the B.1.1.7-like strains have lower transmissibility than the B.1.1.7  
96 strains. The binomial probability was used to test the null hypothesis, and the test was  
97 one-tailed. The analysis was based on the data version “data.2021-03-06” ( $n =$   
98 400,051) of Coronavirus GenBrowser (CGB) (18), where  $n$  is the number of viral  
99 strains.

100 The difference between the first appearance time of the B.1.1.7-like and that of  
101 the B.1.1.7 strain is small (Figures 1A, 2A). Therefore, we set the probability to  
102 observe a B.1.1.7-like or a B.1.1.7 strain as 0.5 under the null hypothesis. This is a

103 conservative treatment since the B.1.1.7-like strain emerged before the B.1.1.7 strain,  
104 thus the former had more time to spread than the latter.

105

### 106 **Reappearance of mutations in the evolutionary tree**

107 To examine the reappearance of mutations, recurrent mutations and mutations  
108 due to recombination were considered. Considering the degeneracy of the genetic  
109 code, we searched amino acid mutations by using the form of amino acid change,  
110 instead of that of nucleotide change in the CGB (18). To search the non-coding  
111 deletion (g.a28271-) in the evolutionary tree, we used the string “A28271-”. To  
112 present the reappearance patterns of mutations, the data version “data.2021-03-06”  
113 ( $n = 400,051$ ) of the CGB (18) was used. This data was also used to examine the  
114 frequency trajectory of a B.1.1.7 characteristic mutation after the B.1.1.7 strains were  
115 excluded.

116

### 117 **Identification of new canonical B.1.1.7 genomic sequence**

118 The CGB was employed to identify a new canonical B.1.1.7 genomic sequence  
119 (5) that carries the deletion g.a28271- and all other B.1.1.7 characteristic mutations  
120 (Figure 1A, Supplementary Table S1). We first selected all the strains in the B.1.1.7  
121 (CGB84017.91425) clade that carries all the B.1.1.7 characteristic mutations  
122 including g.a28271-. Then we filtered the strains by date and only kept the strains  
123 collected before 1 November, 2020. Viral strains with extra mutations were ignored.  
124 Then the sequence with accession EPI\_ISL\_629703, as the suggested new canonical  
125 B.1.1.7 genomic sequence, is the first collected high-quality sequence without any  
126 extra mutations after the deletion g.a28271- occurred (Supplementary Figure S2).

127

## 128 **Results**

### 129 **A crucial non-coding deletion in the B.1.1.7 lineage**

130 The sequential occurrence order of B.1.1.7 characteristic mutations may provide  
131 the important clues to identify the crucial mutations for the B.1.1.7 high

132 transmissibility. Therefore, the B.1.1.7 lineage was examined using the Coronavirus  
133 GenBrowser (CGB) (18). The CGB evolutionary tree shows the sequential occurrence  
134 of B.1.1.7 characteristic mutations (Figure 1A). Interestingly, the results indicate that,  
135 after all the B.1.1.7 characteristic amino acid mutations occurred, the rapid spread of  
136 virus was not observed until a non-coding deletion occurred. To confirm the  
137 evolutionary path of B.1.1.7, we applied VENAS (19) to obtain an evolution network  
138 of SARS-CoV-2 major haplotypes (Figure 1B). The results are consistent with that of  
139 CGB evolutionary tree based analysis. Therefore, the occurrence of a non-coding  
140 deletion (g.a28271-), accompanied with other B.1.1.7 amino acid changes,  
141 immediately causes the rapid spread of B.1.1.7 VOC.

142

### 143 **The non-coding deletion effectively increases the transmissibility of B.1.1.7**

144 The occurrence of the non-coding deletion, located between *ORF8* and *N* genes,  
145 immediately causes the rapid spread of B.1.1.7 VOC (Figure 1A). To evaluate the  
146 effectiveness of the non-coding deletion in increasing the viral transmissibility, we  
147 compared the number of B.1.1.7-like strains, *i.e.*, lacking the non-coding deletion but  
148 carrying all other characteristic mutations of B.1.1.7 (5), with that of B.1.1.7 strains.  
149 Their numbers are highly significantly different ( $n = 259$  vs 92,688,  $P$ -value  $< 4.9 \times$   
150  $10^{-324}$ ), indicating that B.1.1.7-like strains do not demonstrate a high transmissibility  
151 as B.1.1.7 strains do. Therefore, the non-coding deletion g.a28271- may contribute  
152 markedly to increase the transmissibility of B.1.1.7.

153 Pooling data of viral sequences from different countries is likely to be biased due  
154 to complex differences in sampling with respect to either viral genome sequencing  
155 capacities or anti-contagion policies on the pandemic among the targeted countries  
156 (27). To address this problem, the numbers of B.1.1.7-like and B.1.1.7 strains were  
157 pairwise compared for individual countries and continents (Figure 2A), *i.e.*, England  
158 (27 vs 76,871), Spain (30 vs 712), Switzerland (8 vs 1,332), Germany (2 vs 570), USA  
159 (8 vs 1,028), Australia (1 vs 58), South America (1 vs 22), Africa (1 vs 86), and Asia  
160 (3 vs 642). The transmissibility of strains without or with the non-coding deletion is

161 significantly unequal (Table 1,  $P\text{-value} \leq 2.74 \times 10^{-6}$ ). The same highly significant  
162 statistics was observed in 10 more countries, such as India and Italy. Moreover, the  
163 same conclusion holds when considering different gender and age groups  
164 (Supplementary Tables S2, S3). Therefore, the non-coding deletion g.a28271-  
165 effectively increases the transmissibility of B.1.1.7.

166

### 167 **The g.a28271- and g.gat28280cta change the core Kozak sites of *N* and *ORF9b*** 168 **genes**

169 The base 28,271 is located at the third base upstream of the start codon of the *N*  
170 gene, whose expression is associated with the viral replication and has the highest  
171 translational rate (28, 29). The g.a28271- deletion makes t28,270 to slip one base and  
172 changes the Kozak context of gene *N* from a suboptimal one (A at -3, T at +4) to an  
173 undesirable one (T at -3, T at +4) (Figure 2B) (30). When the homological site of the  
174 SARS-CoV genome was mutated to another undesirable one (C at -3, T at +4), the  
175 expression of *N* protein was reduced and the translation of *ORF9b* protein increased  
176 (31). The *ORF9b* protein was found to be translated via a leaky ribosomal scanning  
177 mechanism (31), and has an interferon (IFN) antagonistic activity and can suppress  
178 the IFN production (32). A recent proteomics survey found that the B.1.1.7 VOC has  
179 dramatically increased protein level of *ORF9b* (12), which is consistent with the  
180 function of the Kozak-related non-coding deletion.

181 Another B.1.1.7 mutation g.gat28280cta (N:p.D3L) at the ninth base downstream  
182 of the deletion g.a28271- changes the Kozak core sequence of *ORF9b* (Figure 2B)  
183 (30). It is expected that the expression level of *ORF9b* protein may be affected (30).  
184 However, this remains to be determined because of the leaky ribosomal scanning  
185 effect (31). Overall, these two mutations change the core Kozak sites and may  
186 co-affect the translational efficiency of gene *N* and *ORF9b*.

187

### 188 **High viral transmissibility associated with multiple B.1.1.7 mutations**

189 Besides the non-coding deletion, there are 16 non-synonymous mutations and

190 amino-acid deletions occurred recently along the B.1.1.7 lineage (Figure 1A),  
191 including S:p.N501Y and S:p.P681H. We then examined whether each of those  
192 mutations alone could increase the viral transmissibility in the background of the  
193 D614G substitution. Since all these mutations have appeared multiple times in the  
194 genome of SARS-CoV-2 (Supplementary Figure S3), we checked the frequency  
195 trajectory of each mutation when the B.1.1.7 lineage was excluded. We did not find a  
196 rapid frequency growth (Supplementary Figure S4), indicating that each of these 17  
197 mutations alone is not associated with high viral transmissibility since the pandemic.  
198 Thus it is very unlikely that the high transmissibility of B.1.1.7 is caused by a single  
199 mutation.

200 We then searched the variants carrying the non-coding deletion and other 16  
201 B.1.1.7 characteristic mutations (Figure 1A) in non-B.1.1.7 clades. Clades were  
202 chosen only if the occurrence of a B.1.1.7 characteristic mutation immediately leads a  
203 relatively rapid spread of virus. The largest clade (CGB199165.262639) is evidential  
204 to the synergistical effect among its associated mutations (Figure 3) in the background  
205 of the D614G substitution (8, 9). The two mutations (S:p.P681H, and S:p.T716I) first  
206 occur, and no rapid spread is observed until g.a28271- occurs. The variant with the  
207 first two mutations appears to spread significantly slower than the triple-mutated  
208 variant ( $n = 59$  vs 1,196,  $P$ -value =  $1.92 \times 10^{-276}$ ). The conclusion remains the  
209 same when only considering the strains collected from the USA ( $n = 43$  vs 1,118,  
210  $P$ -value =  $1.47 \times 10^{-271}$ ). This observation suggests that g.a28271- may interact  
211 synergistically with one, or both of S:p.P681H and S:p.T716I to increase the viral  
212 transmissibility.

213

## 214 **Discussion**

215 In this study, we find that the non-coding deletion g.a28271- plays an essential  
216 role in the high transmissibility of B.1.1.7 VOC. It has been documented that the  
217 B.1.1.7 spike improves the angiotensin-converting enzyme 2 (ACE2) affinity for  
218 about 5-fold, comparing with the D614G spike (11). However, the epidemiological



219 data show that this increase of ACE2 affinity cannot cause the high transmissibility of  
220 B.1.1.7 VOC when the non-coding deletion g.a28271- is lack.

221 Sequence with accession EPI\_ISL\_601443 was previously recommended to be  
222 the canonical B.1.1.7 genomic sequence (5). However, it does not carry the crucial  
223 non-coding deletion g.a28271-. The deletion is not presented in the pathogen  
224 genomics platform Nextstrain either ([www.nextstrain.org](http://www.nextstrain.org)) (17) because it is  
225 non-coding. Therefore, to investigate the viral transmissibility, we suggest using the  
226 sequence with accession EPI\_ISL\_629703 as the canonical B.1.1.7 genomic sequence  
227 (collected 21 October, 2020, in the UK) (Supplementary Figure S2).

228 Interestingly, it is likely that the deletion g.a28271- occurs due to recurrent  
229 mutation instead of recombination in the B.1.1.7 lineage. First, the probability of  
230 occurring g.a28271- is high. There are four continuous 'A' nucleotides between  
231 28,271 and 28,274 (Figure 2B). When one of these nucleotides is deleted, it causes the  
232 same effect. All of those deletions are categorized as g.a28271- in the CGB. Thus, the  
233 deletion rate is roughly quadrupled. Second, there is only one mutation g.a28271- on  
234 the identified branch (CGB84017.91425). Recombination tends to create a hybrid  
235 genomic structure (18, 33). The two previously mutated alleles (g28111, cta28280)  
236 remain unchanged when the mutation g.a28271- occurs although both mutated alleles  
237 are next to the genomic position 28,271. Therefore, g.a28271- may be occurred as  
238 recurrent mutation in the B.1.1.7 clade.

239 Genomic mutations related to the transmissibility of a pandemic etiological  
240 pathogen such as SARS-CoV-2 is complex and difficult to be revealed merely *via*  
241 genetic analysis with limited and incomplete supporting data of epidemiology.  
242 However, this study unveils a few of the crucial mutations, *S*-gene and other genes,  
243 non-synonymous and non-coding mutations of B.1.1.7, all likely affect the  
244 transmissibility synergistically as a beneficial haplotype. Moreover, g.a28271- was  
245 also found in the Delta VOC, known as the Indian VOC or B.1.617.2 (Supplementary  
246 Figure S5). Overall, our analyses indicate that non-coding mutations can be crucial for  
247 viral transmissibility by altering translational efficiency and interacting with other

248 mutations.

249

## 250 **Acknowledgments**

251 We thank the researchers who generated and deposited sequence data of  
252 SARS-CoV-2 in GISAID, GenBank, CNGBdb, GWH, and NMDC. This work was  
253 supported by grants from the Strategic Priority Research Program of the Chinese  
254 Academy of Sciences (Grant No. XDB38030100), the National Key Research and  
255 Development Project (Grant Nos. 2020YFC0847000, 2021YFC0863300, and  
256 2020YFC0845900), the National Natural Science Foundation of China (Grant No.  
257 91531306), and the Shandong Academician Workstation Program #170401 (to  
258 G.P.Z.).

259

260

261 **References**

- 262 1. Rambaut, A, Loman, N, Pybus, O, *et al.* Preliminary genomic characterisation of  
263 an emergent SARS-CoV-2 lineage in the UK defined by a novel set of spike  
264 mutations. virologicalorg. 2020:  
265 [https://virological.org/t/preliminary-genomic-characterisation-of-an-emergent-sar](https://virological.org/t/preliminary-genomic-characterisation-of-an-emergent-sar-s-cov-2-lineage-in-the-uk-defined-by-a-novel-set-of-spike-mutations/563)  
266 [s-cov-2-lineage-in-the-uk-defined-by-a-novel-set-of-spike-mutations/563](https://virological.org/t/preliminary-genomic-characterisation-of-an-emergent-sar-s-cov-2-lineage-in-the-uk-defined-by-a-novel-set-of-spike-mutations/563).
- 267 2. Volz, E, Mishra, S, Chand, M, *et al.* Assessing transmissibility of SARS-CoV-2  
268 lineage B.1.1.7 in England. Nature. 2021; 593: 266-9.
- 269 3. Davies, NG, Abbott, S, Barnard, RC, *et al.* Estimated transmissibility and impact  
270 of SARS-CoV-2 lineage B.1.1.7 in England. Science. 2021; 372: eabg3055.
- 271 4. Wu, F, Zhao, S, Yu, B, *et al.* A new coronavirus associated with human  
272 respiratory disease in China. Nature. 2020; 579: 265-9.
- 273 5. Chand, M, Hopkins, S, Dabrera, G, *et al.* Investigation of novel SARS-CoV-2  
274 variant of concern 202012/01.  
275 [https://assets.publishing.service.gov.uk/government/uploads/system/uploads/attach](https://assets.publishing.service.gov.uk/government/uploads/system/uploads/attachment_data/file/959438/Technical_Briefing_VOC_SH_NJL2_SH2.pdf)  
276 [ement\\_data/file/959438/Technical\\_Briefing\\_VOC\\_SH\\_NJL2\\_SH2.pdf](https://assets.publishing.service.gov.uk/government/uploads/system/uploads/attachment_data/file/959438/Technical_Briefing_VOC_SH_NJL2_SH2.pdf). 2020.
- 277 6. Starr, TN, Greaney, AJ, Hilton, SK, *et al.* Deep mutational scanning of  
278 SARS-CoV-2 receptor binding domain reveals constraints on folding and ACE2  
279 binding. Cell. 2020; 182: 1295-310.
- 280 7. Tegally, H, Wilkinson, E, Giovanetti, M, *et al.* Detection of a SARS-CoV-2  
281 variant of concern in South Africa. Nature. 2021; 592: 438-43.
- 282 8. Zhou, B, Thao, TTN, Hoffmann, D, *et al.* SARS-CoV-2 spike D614G change  
283 enhances replication and transmission. Nature. 2021; 592: 122-7.
- 284 9. Korber, B, Fischer, WM, Gnanakaran, S, *et al.* Tracking changes in SARS-CoV-2  
285 Spike: Evidence that D614G increases infectivity of the COVID-19 virus. Cell.  
286 2020; 182: 812-27.
- 287 10. V'kovski, P, Kratzel, A, Steiner, S, *et al.* Coronavirus biology and replication:  
288 implications for SARS-CoV-2. Nat Rev Microbiol. 2021; 19: 155-70.
- 289 11. Gobeil, SM-C, Janowska, K, McDowell, S, *et al.* Effect of natural mutations of

- 290 SARS-CoV-2 on spike structure, conformation, and antigenicity. *Science*. 2021.
- 291 12. Thorne, LG, Bouhaddou, M, Reuschl, A-K, *et al.* Evolution of enhanced innate  
292 immune evasion by the SARS-CoV-2 B.1.1.7 UK variant. *bioRxiv*. 2021.
- 293 13. Lubinski, B, Tang, T, Daniel, S, *et al.* Functional evaluation of proteolytic  
294 activation for the SARS-CoV-2 variant B.1.1.7: role of the P681H mutation.  
295 *bioRxiv*. 2021.
- 296 14. Khan, A, Zia, T, Suleman, M, *et al.* Higher infectivity of the SARS-CoV-2 new  
297 variants is associated with K417N/T, E484K, and N501Y mutants: An insight  
298 from structural data. *Journal of cellular physiology*. 2021.
- 299 15. Liu, Y, Liu, J, Plante, KS, *et al.* The N501Y spike substitution enhances  
300 SARS-CoV-2 transmission. *bioRxiv*. 2021.
- 301 16. Cai, Y, Zhang, J, Xiao, T, *et al.* Structural basis for enhanced infectivity and  
302 immune evasion of SARS-CoV-2 variants. *Science*. 2021: eabi9745.
- 303 17. Hadfield, J, Megill, C, Bell, SM, *et al.* Nextstrain: real-time tracking of pathogen  
304 evolution. *Bioinformatics*. 2018; 34: 4121-3.
- 305 18. Yu, D, Yang, X, Tang, B, *et al.* Coronavirus GenBrowser for monitoring the  
306 transmission and evolution of SARS-CoV-2. *medRxiv*. 2021.
- 307 19. Ling, Y, Cao, R, Qian, J, *et al.* An interactive viral genome evolution network  
308 analysis system enabling rapid large-scale molecular tracing of SARS-CoV-2.  
309 *bioRxiv*. 2020.
- 310 20. Zhao, W-M, Song, S-H, Chen, M-L, *et al.* The 2019 novel coronavirus resource.  
311 *Hereditas (Beijing)*. 2020; 42(2): 212-21.
- 312 21. Gong, Z, Zhu, J-W, Li, C-P, *et al.* An online coronavirus analysis platform from  
313 the National Genomics Data Center. *Zool Res*. 2020; 41(6): 705-8.
- 314 22. Elbe, S, Buckland-Merrett, G. Data, disease and diplomacy: GISAID's innovative  
315 contribution to global health. *Glob Chall*. 2017; 1(1): 33-46.
- 316 23. Shu, YL, McCauley, J. GISAID: Global initiative on sharing all influenza data -  
317 from vision to reality. *Eurosurveillance*. 2017; 22(13): 2-4.
- 318 24. Sayers, EW, Beck, J, Bolton, EE, *et al.* Database resources of the National Center

- 319 for Biotechnology Information. *Nucleic Acids Res.* 2021; 49: D10-D7.
- 320 25. Chen, F, You, L, Yang, F, *et al.* CNGBdb: China National GeneBank DataBase.
- 321 *Hereditas (Beijing)*. 2020; 42(8): 799-809.
- 322 26. Zhang, Z, Zhao, W, Xiao, J, *et al.* Database resources of the National Genomics
- 323 Data Center in 2020. *Nucleic Acids Res.* 2020; 48(D1): D24-D33.
- 324 27. Hsiang, S, Allen, D, Annan-Phan, S, *et al.* The effect of large-scale anti-contagion
- 325 policies on the COVID-19 pandemic. *Nature*. 2020; 584: 262-7.
- 326 28. Bojkova, D, Klann, K, Koch, B, *et al.* Proteomics of SARS-CoV-2-infected host
- 327 cells reveals therapy targets. *Nature*. 2020; 583: 469-72.
- 328 29. Schelle, B, Karl, N, Ludewig, B, *et al.* Selective replication of coronavirus
- 329 genomes that express nucleocapsid protein. *J Virol.* 2005; 79: 6620-30.
- 330 30. Kozak, M. At least six nucleotides preceding the AUG initiator codon enhance
- 331 translation in mammalian cells. *J Mol Biol.* 1987; 196: 947-50.
- 332 31. Xu, K, Zheng, BJ, Zeng, R, *et al.* Severe acute respiratory syndrome coronavirus
- 333 accessory protein 9b is a virion-associated protein. *Virology*. 2009; 388: 279-85.
- 334 32. Wu, J, Shi, YH, Pan, XY, *et al.* SARS-CoV-2 ORF9b inhibits RIG-I-MAVS
- 335 antiviral signaling by interrupting K63-linked ubiquitination of NEMO. *Cell Rep.*
- 336 2021; 34: 108761.
- 337 33. Lam, HM, Ratmann, O, Boni, MF. Improved algorithmic complexity for the
- 338 3SEQ recombination detection algorithm. *Mol Biol Evol.* 2018; 35: 247-51.
- 339 34. Tang, X, Wu, C, Li, X, *et al.* On the origin and continuing evolution of
- 340 SARS-CoV-2. *Natl Sci Rev.* 2020; 7: 1012-23.

341

A

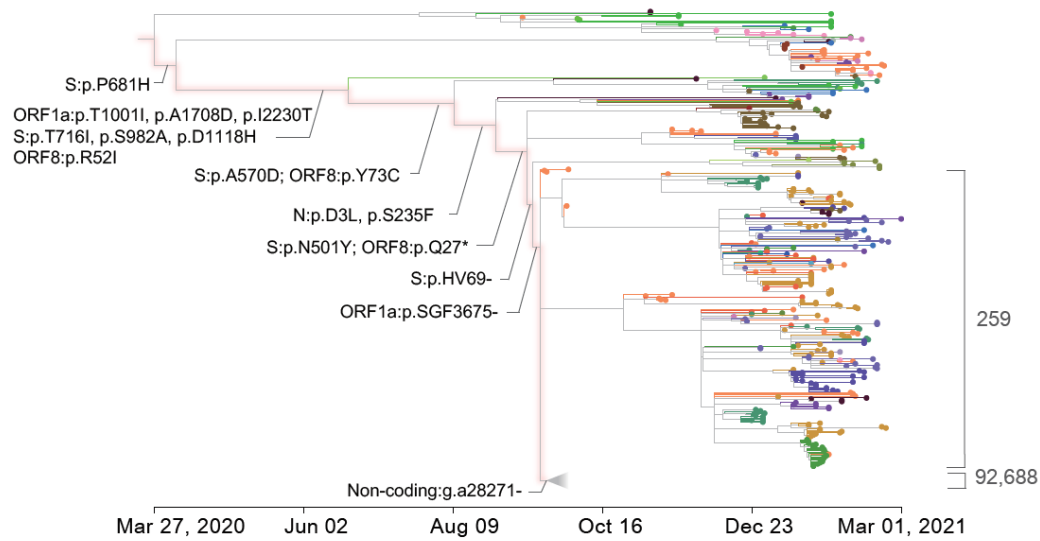

B

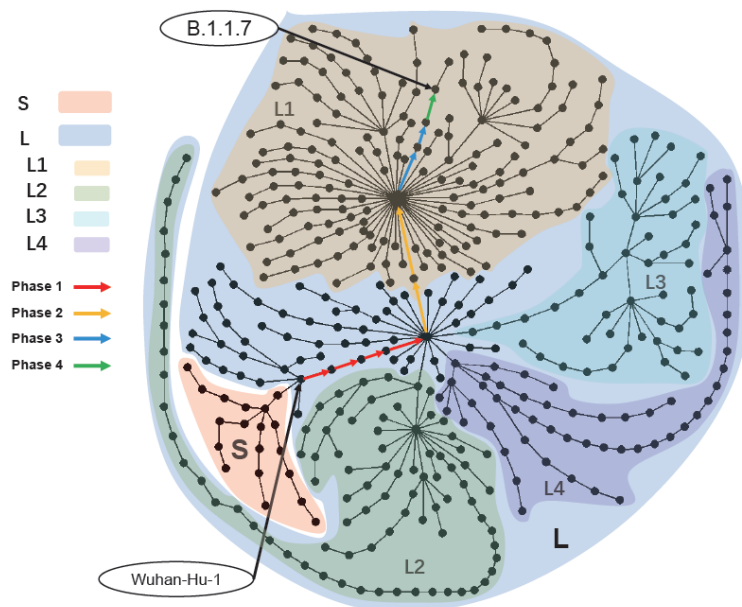

342

343 **Figure 1 Sequential occurrence order of B.1.1.7 mutations.**

344 (A) CGB evolutionary tree of SARS-CoV-2 lineage B.1.1.7. The analysis was  
 345 performed on 400,051 high-quality SARS-CoV-2 genomic sequences using the  
 346 Coronavirus GenBrowser (18). The searchable CGB ID of the internal node with  
 347 g.a28271- is CGB84017.91425, assigned by the CGB binary nomenclature system.  
 348 The B.1.1.7 clade was collapsed. The mutations on the highlighted branches were  
 349 labeled. The number of B.1.1.7-like strains is 259, and the number of B.1.1.7  
 350 strains is 92,688.

351 (B) VENAS evolution network of SARS-CoV-2 by January 14, 2021. The dots

352 represent the major genome types of SARS-CoV-2, and the lines between the dots  
353 are the evolutionary path formed by the combination of variants; the color shades  
354 represent the clades and subclades formed by genome types, where the L1  
355 subclade is shaded in yellow; the L2 in green; the L3 in cyan, and the L4 in purple.  
356 The L/S naming system follows the previous study (34). The color arrows mark  
357 the evolutionary path from the most recent common ancestor of SARS-CoV2 to  
358 the B.1.1.7 lineage, and four phases are indicated in different colors.

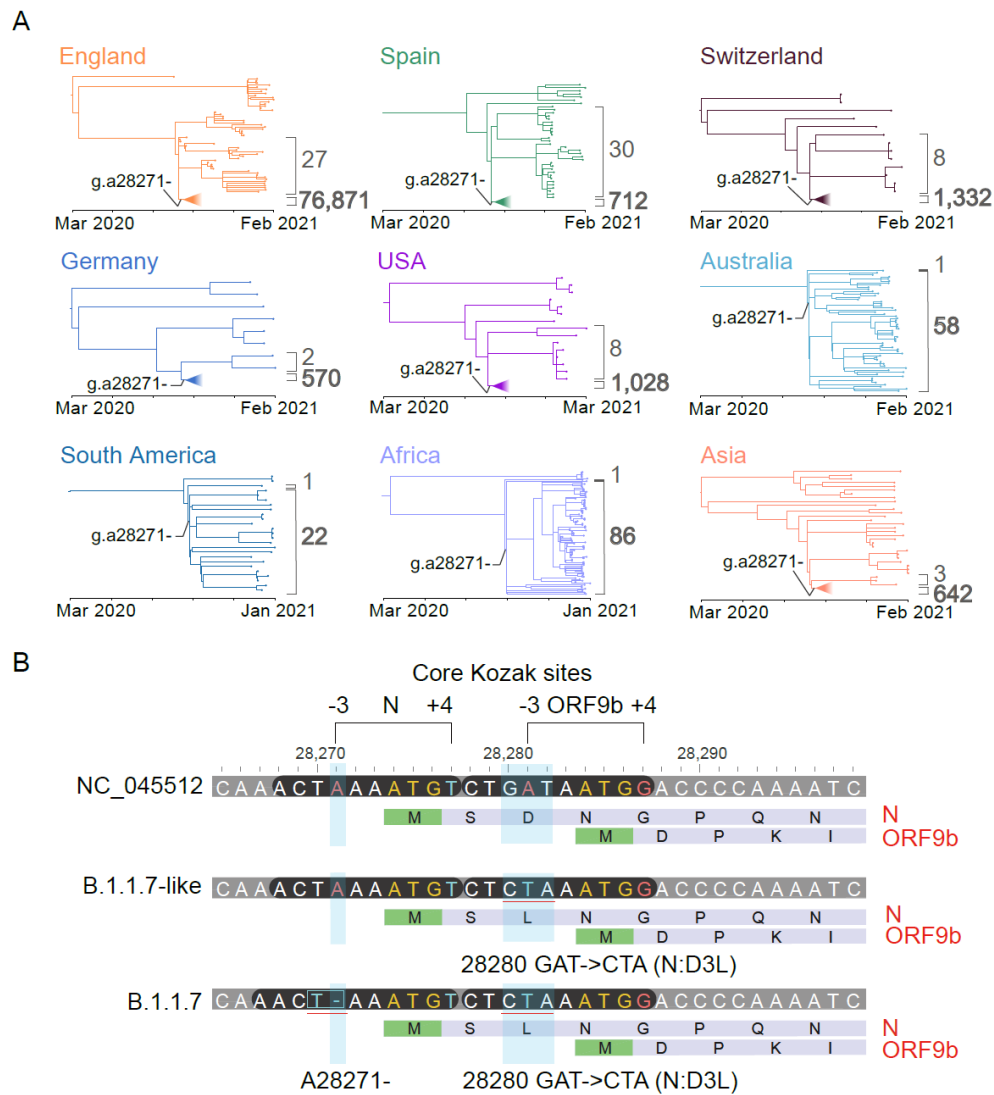

359

360 **Figure 2. A Kozak-related non-coding deletion g.a28271- is essential for the high**  
361 **transmissibility of the B.1.1.7 VOC.**

362 (A) The different transmissibility between the B.1.1.7-like and the B.1.1.7 strains *via*  
363 employing the CGB (18). Strains were filtered for different countries or continents.

364 The B.1.1.7 clade was collapsed if its size was too large to be shown. For each  
365 sub-tree, the plain number of B.1.1.7-like (without the non-coding deletion) strains  
366 and the bold number of B.1.1.7 (with the deletion) strains are labeled.

367 (B) Two B.1.1.7 mutations change the core Kozak sites of *N* and *ORF9b* genes. The  
368 two positions -3 and +4 have the dominant influence (30). The grey bars are the  
369 nucleotide sequences of the variants. Two functional genes are presented under  
370 each sequence. Start codons are shown in green. The *N* and *ORF9b* genes with



371 their amino acid sequences are colored in light purple. Sites that mutations  
372 happened are covered in light blue rectangle. The optimal Kozak sites are colored  
373 in red and non-optimal ones in light blue.

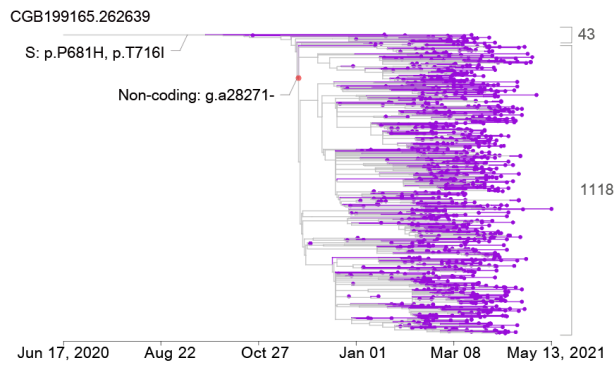

374

375 **Figure 3. A non-B.1.1.7 rapid expanding clade carrying the non-coding deletion**  
376 **g.a28271- and two B.1.1.7 characteristic mutations in the background of the**  
377 **D614G substitution.**

378 The searchable CGB ID of the expanding node (marked by red point) was presented  
379 on the top of tree. The B.1.1.7 mutations were marked. The data version  
380 “data.2021-05-20” ( $n = 875,338$ ) of the CGB (18) was used. The strains collected  
381 from the USA were shown.

382

383 **Table 1. The number of B.1.1.7-like and B.1.1.7 strains in different countries and**  
384 **continents.**

| Country/continent*         | The number of strains |         | P-value                  |
|----------------------------|-----------------------|---------|--------------------------|
|                            | B.1.1.7-like          | B.1.1.7 |                          |
| England <sup>†</sup>       | 27                    | 76,871  | $< 4.9 \times 10^{-324}$ |
| Spain <sup>†</sup>         | 30                    | 712     | $1.16 \times 10^{-170}$  |
| Switzerland <sup>†</sup>   | 8                     | 1,332   | $< 4.9 \times 10^{-324}$ |
| Germany <sup>†</sup>       | 2                     | 570     | $1.06 \times 10^{-167}$  |
| USA <sup>†</sup>           | 8                     | 1,028   | $4.35 \times 10^{-293}$  |
| Australia <sup>†</sup>     | 1                     | 58      | $1.02 \times 10^{-16}$   |
| Norway                     | 1                     | 210     | $6.41 \times 10^{-62}$   |
| Denmark                    | 1                     | 4,494   | $< 4.9 \times 10^{-324}$ |
| India                      | 2                     | 16      | $5.84 \times 10^{-4}$    |
| Ireland                    | 2                     | 897     | $9.55 \times 10^{-266}$  |
| France                     | 2                     | 1,059   | $2.27 \times 10^{-314}$  |
| Sweden                     | 16                    | 182     | $3.56 \times 10^{-37}$   |
| Finland                    | 26                    | 198     | $2.60 \times 10^{-34}$   |
| Austria                    | 28                    | 242     | $4.85 \times 10^{-44}$   |
| Italy                      | 29                    | 734     | $5.33 \times 10^{-178}$  |
| Belgium                    | 72                    | 1,230   | $4.52 \times 10^{-273}$  |
| South America <sup>†</sup> | 1                     | 22      | $2.74 \times 10^{-6}$    |
| Africa <sup>†</sup>        | 1                     | 86      | $5.62 \times 10^{-25}$   |
| Asia <sup>†</sup>          | 3                     | 642     | $3.05 \times 10^{-187}$  |

385 \*Countries/continents with more than 10 viral strains (B.1.1.7-like and B.1.1.7).

386 <sup>†</sup>These six countries and three continents were shown in Figure 2A.

387
